# Supplementary material for: Severe Burn Injury Progression and Phasic Changes of Gene Expression in Mouse Model
Source: Springer Nature journal article supplement (doi:10.1007/s10753-019-00984-5), 2019-03-16
Supplement: MOESM2 [file 16553916]

## Sheet: turquoise
F3
Shd
Ackr3
Fam20c
Resp18
Vdr
Alg14
Msh4
Slc4a8
Rab3il1
Chek1
Grid1
Mxd1
Klf9
Mycs
Mmp1b
Tcl1
NA
Cnnm2
Arrdc4
Slamf6
Dguok
Tyw1
Dscaml1
Ids
Dab2
Ankrd24
6030498E09Rik
Herc6
Ccdc30
Clec4g
4932434E15Rik
Eps8l1
Fam228a
Zim2
9530004P13Rik
Sox7
NA
NA
4930456A14Rik
5031415H12Rik
Cbarp
Zmat4
Nsun5
Sned1
Lonrf3
Nat8f4
Fem1a
Slc9a2
Napepld
Rab20
Myom2
Zfp616
Apopt1
Pax6os1
NA
NA
Map3k20
Tmie
Gpn1
Lpar2
NA
NA
Kalrn
LOC102633357
Mid1
NA
NA
NA
NA
NA
NA
Gla
Chek1
Ltf
Cldn1
Pcdhb8
Chek1
Zfp160
Gm8479
Fam57b
9530077C05Rik
Troap
4930517N10Rik
NA
5430434N17Rik
Hdac10
Wnk2
Spata21
Wscd1
Gas1
Gm4924
NA
Plscr1
NA
Tnfsf13b
NA
Grin3a
NA
Tsen2
NA
NA
Tex43
AA517562
1500015O10Rik
Trem1
Crispld2
NA

## Sheet: blue
Lgals2
Pdk4
Sod3
Cdkn1c
Chad
Tcf23
Pou4f3
Cables1
Meig1
Steap1
Mt2
Cfap161
Mageb16
Sat2
2610035F20Rik
Prr30
4932414N04Rik
9130214F15Rik
D530015H24Rik
Adora2b
Ciart
Arhgef9
Gm11716
Ctnna3
Zfp286
Tmem202
NA
AU022054
Slc35a4
Vcam1
Zdhhc2
Slc7a15
Nasp
Fbxl21
Gm4047
Egfr
Slit2
NA
NA
2810408A11Rik

## Sheet: brown
Prl8a8
Gpnmb
9230110C19Rik
NA
Adamts18
NA
Dbh
AI594671
Magi1
Slc1a3
1500009C09Rik
Agbl4
Masp1
Cyp11a1
NA
NA
NA
NA

## Sheet: yellow
NA
Cct6b
Anpep
Ntn1
Pih1d2
Syt16
Ret
Slbp
Rgs2
NA
NA
NA
Nr2c2
Pde6c
C530008M17Rik
Mrpl54
Gm996

## Sheet: green
Cela3b
Ugt3a2
Jam2
Ppih
4933428C20Rik
Abca13
NA
Actr1b
Sdc4
Slc25a13
Il1rap
Dsg2
Pcolce2
A530058O07Rik
C77683
Aoah

## Sheet: red
Ctnnbip1
Lipg
Cacna1h
Nup43
NA
Itgb2l
Hmmr
Lipg

## Sheet: grey
Ndst4
Radil
NA
Arl11
NA
Sema3d
Gpr12
