# Supplementary material for: Severe Burn Injury Progression and Phasic Changes of Gene Expression in Mouse Model
Source: Springer Nature journal article supplement (doi:10.1007/s10753-019-00984-5), 2019-03-16
Supplement: MOESM3 [file 16553916]

## Sheet: supplemental Table2
Category	ID	Name	Source	p-value	Hit Count in Query List	Hit Count in Genome	Hit in Query List
GO: Molecular Function	GO:0004145	diamine N-acetyltransferase activity		0.002892	1	2	SAT2
GO: Molecular Function	GO:0050839	cell adhesion molecule binding		0.003278	3	208	EGFR,VCAM1,CTNNA3
GO: Molecular Function	GO:0005006	epidermal growth factor-activated receptor activity		0.004335	1	3	EGFR
GO: Molecular Function	GO:0004740	pyruvate dehydrogenase (acetyl-transferring) kinase activity		0.005775	1	4	PDK4
GO: Molecular Function	GO:0048408	epidermal growth factor binding		0.005775	1	4	EGFR
GO: Molecular Function	GO:0004784	superoxide dismutase activity		0.007214	1	5	SOD3
GO: Molecular Function	GO:0016721	oxidoreductase activity, acting on superoxide radicals as acceptor		0.007214	1	5	SOD3
GO: Molecular Function	GO:0052851	ferric-chelate reductase (NADPH) activity		0.007214	1	5	STEAP1
GO: Molecular Function	GO:0008823	cupric reductase activity		0.007214	1	5	STEAP1
GO: Molecular Function	GO:0004860	protein kinase inhibitor activity		0.007306	2	89	CDKN1C,CHAD
GO: Molecular Function	GO:0019210	kinase inhibitor activity		0.007626	2	91	CDKN1C,CHAD
GO: Molecular Function	GO:0008131	primary amine oxidase activity		0.008651	1	6	VCAM1
GO: Molecular Function	GO:0086083	cell adhesive protein binding involved in bundle of His cell-Purkinje myocyte communication		0.008651	1	6	CTNNA3
GO: Molecular Function	GO:0016936	galactoside binding		0.008651	1	6	LGALS2
GO: Molecular Function	GO:0043237	laminin-1 binding		0.01009	1	7	SLIT2
GO: Molecular Function	GO:0001609	G protein-coupled adenosine receptor activity		0.01152	1	8	ADORA2B
GO: Molecular Function	GO:0048495	Roundabout binding		0.01295	1	9	SLIT2
GO: Molecular Function	GO:0005178	integrin binding		0.01317	2	121	EGFR,VCAM1
GO: Molecular Function	GO:0086080	protein binding involved in heterotypic cell-cell adhesion		0.01438	1	10	CTNNA3
GO: Molecular Function	GO:0030235	nitric-oxide synthase regulator activity		0.01438	1	10	EGFR
GO: Molecular Function	GO:0051015	actin filament binding		0.01553	2	132	EGFR,CTNNA3
GO: Molecular Function	GO:0016723	oxidoreductase activity, oxidizing metal ions, NAD or NADP as acceptor		0.01581	1	11	STEAP1
GO: Molecular Function	GO:0098632	cell-cell adhesion mediator activity		0.01723	1	12	CTNNA3
GO: Molecular Function	GO:0004861	cyclin-dependent protein serine/threonine kinase inhibitor activity		0.01723	1	12	CDKN1C
GO: Molecular Function	GO:0004857	enzyme inhibitor activity		0.01864	3	393	CDKN1C,SLIT2,CHAD
GO: Molecular Function	GO:0005095	GTPase inhibitor activity		0.02007	1	14	SLIT2
GO: Molecular Function	GO:0016641	oxidoreductase activity, acting on the CH-NH2 group of donors, oxygen as acceptor		0.02149	1	15	VCAM1
GO: Molecular Function	GO:0005351	carbohydrate:proton symporter activity		0.02291	1	16	SLC35A4
GO: Molecular Function	GO:0005402	carbohydrate:cation symporter activity		0.02291	1	16	SLC35A4
GO: Molecular Function	GO:0008201	heparin binding		0.02413	2	167	SLIT2,SOD3
GO: Molecular Function	GO:0098631	cell adhesion mediator activity		0.02574	1	18	CTNNA3
GO: Molecular Function	GO:0016722	oxidoreductase activity, oxidizing metal ions		0.02574	1	18	STEAP1
GO: Molecular Function	GO:0016638	oxidoreductase activity, acting on the CH-NH2 group of donors		0.02715	1	19	VCAM1
GO: Molecular Function	GO:0019887	protein kinase regulator activity		0.03213	2	195	CDKN1C,CHAD
GO: Molecular Function	GO:0043395	heparan sulfate proteoglycan binding		0.03277	1	23	SLIT2
GO: Molecular Function	GO:0019706	protein-cysteine S-palmitoyltransferase activity		0.03557	1	25	ZDHHC2
GO: Molecular Function	GO:0015295	solute:proton symporter activity		0.03837	1	27	SLC35A4
GO: Molecular Function	GO:0035586	purinergic receptor activity		0.03837	1	27	ADORA2B
GO: Molecular Function	GO:0019207	kinase regulator activity		0.03872	2	216	CDKN1C,CHAD
GO: Molecular Function	GO:0005539	glycosaminoglycan binding		0.0397	2	219	SLIT2,SOD3
GO: Molecular Function	GO:0016747	transferase activity, transferring acyl groups other than amino-acyl groups		0.0397	2	219	ZDHHC2,SAT2
GO: Molecular Function	GO:0045499	chemorepellent activity		0.03976	1	28	SLIT2
GO: Molecular Function	GO:0004709	MAP kinase kinase kinase activity		0.04254	1	30	EGFR
GO: Molecular Function	GO:0030291	protein serine/threonine kinase inhibitor activity		0.04254	1	30	CDKN1C
GO: Molecular Function	GO:0005088	Ras guanyl-nucleotide exchange factor activity		0.04406	2	232	EGFR,ARHGEF9
GO: Molecular Function	GO:0043236	laminin binding		0.04531	1	32	SLIT2
GO: Molecular Function	GO:0045296	cadherin binding		0.04531	1	32	CTNNA3
GO: Molecular Function	GO:0051119	sugar transmembrane transporter activity		0.0467	1	33	SLC35A4
GO: Molecular Function	GO:0043394	proteoglycan binding		0.04946	1	35	SLIT2
GO: Molecular Function	GO:0070888	E-box binding		0.04946	1	35	CIART
GO: Biological Process	GO:0001701	in utero embryonic development		0.0002451	5	417	CDKN1C,NASP,SLIT2,EGFR,VCAM1
GO: Biological Process	GO:0001892	embryonic placenta development		0.0003467	3	99	CDKN1C,EGFR,VCAM1
GO: Biological Process	GO:0031290	retinal ganglion cell axon guidance		0.0004256	2	22	SLIT2,POU4F3
GO: Biological Process	GO:0048608	reproductive structure development		0.0004817	5	483	CDKN1C,NASP,SLIT2,EGFR,VCAM1
GO: Biological Process	GO:0061458	reproductive system development		0.0005001	5	487	CDKN1C,NASP,SLIT2,EGFR,VCAM1
GO: Biological Process	GO:0002544	chronic inflammatory response		0.0005513	2	25	ADORA2B,VCAM1
GO: Biological Process	GO:0060669	embryonic placenta morphogenesis		0.0006928	2	28	CDKN1C,VCAM1
GO: Biological Process	GO:0032919	spermine acetylation		0.001398	1	1	SAT2
GO: Biological Process	GO:0032920	putrescine acetylation		0.001398	1	1	SAT2
GO: Biological Process	GO:0021972	corticospinal neuron axon guidance through spinal cord		0.001398	1	1	SLIT2
GO: Biological Process	GO:0050924	positive regulation of negative chemotaxis		0.001398	1	1	SLIT2
GO: Biological Process	GO:0050929	induction of negative chemotaxis		0.001398	1	1	SLIT2
GO: Biological Process	GO:0046204	nor-spermidine metabolic process		0.001398	1	1	SAT2
GO: Biological Process	GO:0002882	positive regulation of chronic inflammatory response to non-antigenic stimulus		0.001398	1	1	ADORA2B
GO: Biological Process	GO:0001890	placenta development		0.001529	3	165	CDKN1C,EGFR,VCAM1
GO: Biological Process	GO:0048511	rhythmic process		0.001558	4	366	SLIT2,EGFR,CIART,FBXL21
GO: Biological Process	GO:0045124	regulation of bone resorption		0.00171	2	44	EGFR,PDK4
GO: Biological Process	GO:0097305	response to alcohol		0.002116	4	398	NASP,SLIT2,EGFR,VCAM1
GO: Biological Process	GO:0021795	cerebral cortex cell migration		0.002381	2	52	SLIT2,EGFR
GO: Biological Process	GO:0043009	chordate embryonic development		0.002384	5	691	CDKN1C,NASP,SLIT2,EGFR,VCAM1
GO: Biological Process	GO:0009792	embryo development ending in birth or egg hatching		0.002522	5	700	CDKN1C,NASP,SLIT2,EGFR,VCAM1
GO: Biological Process	GO:0046850	regulation of bone remodeling		0.00266	2	55	EGFR,PDK4
GO: Biological Process	GO:0003018	vascular process in circulatory system		0.00272	3	202	ADORA2B,SLIT2,EGFR
GO: Biological Process	GO:1902722	positive regulation of prolactin secretion		0.00279	1	2	EGFR
GO: Biological Process	GO:0032917	polyamine acetylation		0.00279	1	2	SAT2
GO: Biological Process	GO:1902623	negative regulation of neutrophil migration		0.00279	1	2	SLIT2
GO: Biological Process	GO:0002880	regulation of chronic inflammatory response to non-antigenic stimulus		0.00279	1	2	ADORA2B
GO: Biological Process	GO:1900154	regulation of bone trabecula formation		0.00279	1	2	CHAD
GO: Biological Process	GO:0090024	negative regulation of neutrophil chemotaxis		0.00279	1	2	SLIT2
GO: Biological Process	GO:0090260	negative regulation of retinal ganglion cell axon guidance		0.00279	1	2	SLIT2
GO: Biological Process	GO:0043006	activation of phospholipase A2 activity by calcium-mediated signaling		0.00279	1	2	EGFR
GO: Biological Process	GO:0032918	spermidine acetylation		0.00279	1	2	SAT2
GO: Biological Process	GO:0002545	chronic inflammatory response to non-antigenic stimulus		0.00279	1	2	ADORA2B
GO: Biological Process	GO:0071676	negative regulation of mononuclear cell migration		0.00279	1	2	SLIT2
GO: Biological Process	GO:0021966	corticospinal neuron axon guidance		0.00279	1	2	SLIT2
GO: Biological Process	GO:0021836	chemorepulsion involved in postnatal olfactory bulb interneuron migration		0.00279	1	2	SLIT2
GO: Biological Process	GO:0071623	negative regulation of granulocyte chemotaxis		0.00279	1	2	SLIT2
GO: Biological Process	GO:1900155	negative regulation of bone trabecula formation		0.00279	1	2	CHAD
GO: Biological Process	GO:0003006	developmental process involved in reproduction		0.00299	5	728	CDKN1C,NASP,SLIT2,EGFR,VCAM1
GO: Biological Process	GO:0006801	superoxide metabolic process		0.003261	2	61	EGFR,SOD3
GO: Biological Process	GO:0045453	bone resorption		0.003919	2	67	EGFR,PDK4
GO: Biological Process	GO:0022029	telencephalon cell migration		0.004035	2	68	SLIT2,EGFR
GO: Biological Process	GO:0009790	embryo development		0.004056	6	1135	CDKN1C,NASP,SLIT2,POU4F3,EGFR,VCAM1
GO: Biological Process	GO:0048568	embryonic organ development		0.004123	4	479	CDKN1C,POU4F3,EGFR,VCAM1
GO: Biological Process	GO:0021823	cerebral cortex tangential migration using cell-cell interactions		0.004183	1	3	SLIT2
GO: Biological Process	GO:0010593	negative regulation of lamellipodium assembly		0.004183	1	3	SLIT2
GO: Biological Process	GO:0061364	apoptotic process involved in luteolysis		0.004183	1	3	SLIT2
GO: Biological Process	GO:0009447	putrescine catabolic process		0.004183	1	3	SAT2
GO: Biological Process	GO:0021827	postnatal olfactory bulb interneuron migration		0.004183	1	3	SLIT2
GO: Biological Process	GO:0021834	chemorepulsion involved in embryonic olfactory bulb interneuron precursor migration		0.004183	1	3	SLIT2
GO: Biological Process	GO:1903800	positive regulation of production of miRNAs involved in gene silencing by miRNA		0.004183	1	3	EGFR
GO: Biological Process	GO:0071672	negative regulation of smooth muscle cell chemotaxis		0.004183	1	3	SLIT2
GO: Biological Process	GO:0021885	forebrain cell migration		0.00439	2	71	SLIT2,EGFR
GO: Biological Process	GO:0034103	regulation of tissue remodeling		0.005273	2	78	EGFR,PDK4
GO: Biological Process	GO:0050923	regulation of negative chemotaxis		0.005573	1	4	SLIT2
GO: Biological Process	GO:0032431	activation of phospholipase A2 activity		0.005573	1	4	EGFR
GO: Biological Process	GO:0033563	dorsal/ventral axon guidance		0.005573	1	4	SLIT2
GO: Biological Process	GO:0090259	regulation of retinal ganglion cell axon guidance		0.005573	1	4	SLIT2
GO: Biological Process	GO:0072593	reactive oxygen species metabolic process		0.005634	3	262	EGFR,PDK4,SOD3
GO: Biological Process	GO:0042311	vasodilation		0.006232	2	85	ADORA2B,EGFR
GO: Biological Process	GO:0002678	positive regulation of chronic inflammatory response		0.006962	1	5	ADORA2B
GO: Biological Process	GO:0022614	membrane to membrane docking		0.006962	1	5	VCAM1
GO: Biological Process	GO:0071671	regulation of smooth muscle cell chemotaxis		0.006962	1	5	SLIT2
GO: Biological Process	GO:0090027	negative regulation of monocyte chemotaxis		0.006962	1	5	SLIT2
GO: Biological Process	GO:0051414	response to cortisol		0.006962	1	5	SLIT2
GO: Biological Process	GO:0071504	cellular response to heparin		0.006962	1	5	SLIT2
GO: Biological Process	GO:0070100	negative regulation of chemokine-mediated signaling pathway		0.006962	1	5	SLIT2
GO: Biological Process	GO:0033216	ferric iron import		0.006962	1	5	STEAP1
GO: Biological Process	GO:0006598	polyamine catabolic process		0.006962	1	5	SAT2
GO: Biological Process	GO:0048143	astrocyte activation		0.006962	1	5	EGFR
GO: Biological Process	GO:0021831	embryonic olfactory bulb interneuron precursor migration		0.006962	1	5	SLIT2
GO: Biological Process	GO:0008015	blood circulation		0.007015	4	557	ADORA2B,SLIT2,EGFR,CTNNA3
GO: Biological Process	GO:0003013	circulatory system process		0.007147	4	560	ADORA2B,SLIT2,EGFR,CTNNA3
GO: Biological Process	GO:0046849	bone remodeling		0.007571	2	94	EGFR,PDK4
GO: Biological Process	GO:0071503	response to heparin		0.008349	1	6	SLIT2
GO: Biological Process	GO:0010701	positive regulation of norepinephrine secretion		0.008349	1	6	ADORA2B
GO: Biological Process	GO:0021825	substrate-dependent cerebral cortex tangential migration		0.008349	1	6	SLIT2
GO: Biological Process	GO:0032430	positive regulation of phospholipase A2 activity		0.008349	1	6	EGFR
GO: Biological Process	GO:1902744	negative regulation of lamellipodium organization		0.008349	1	6	SLIT2
GO: Biological Process	GO:0086073	bundle of His cell-Purkinje myocyte adhesion involved in cell communication		0.008349	1	6	CTNNA3
GO: Biological Process	GO:0008215	spermine metabolic process		0.008349	1	6	SAT2
GO: Biological Process	GO:0086042	cardiac muscle cell-cardiac muscle cell adhesion		0.009734	1	7	CTNNA3
GO: Biological Process	GO:0070459	prolactin secretion		0.009734	1	7	EGFR
GO: Biological Process	GO:0009445	putrescine metabolic process		0.009734	1	7	SAT2
GO: Biological Process	GO:0071670	smooth muscle cell chemotaxis		0.009734	1	7	SLIT2
GO: Biological Process	GO:0001554	luteolysis		0.009734	1	7	SLIT2
GO: Biological Process	GO:0060763	mammary duct terminal end bud growth		0.009734	1	7	SLIT2
GO: Biological Process	GO:0008216	spermidine metabolic process		0.009734	1	7	SAT2
GO: Biological Process	GO:0021562	vestibulocochlear nerve development		0.009734	1	7	POU4F3
GO: Biological Process	GO:0009991	response to extracellular stimulus		0.01027	4	622	ADORA2B,SLIT2,PDK4,VCAM1
GO: Biological Process	GO:0032103	positive regulation of response to external stimulus		0.01043	3	328	ADORA2B,SLIT2,EGFR
GO: Biological Process	GO:1903522	regulation of blood circulation		0.01095	3	334	ADORA2B,EGFR,CTNNA3
GO: Biological Process	GO:1903524	positive regulation of blood circulation		0.01097	2	114	ADORA2B,EGFR
GO: Biological Process	GO:0070141	response to UV-A		0.01112	1	8	EGFR
GO: Biological Process	GO:0060087	relaxation of vascular smooth muscle		0.01112	1	8	ADORA2B
GO: Biological Process	GO:0060710	chorio-allantoic fusion		0.01112	1	8	VCAM1
GO: Biological Process	GO:0070099	regulation of chemokine-mediated signaling pathway		0.01112	1	8	SLIT2
GO: Biological Process	GO:1901701	cellular response to oxygen-containing compound		0.01137	5	1001	SLIT2,EGFR,PDK4,VCAM1,SOD3
GO: Biological Process	GO:0071363	cellular response to growth factor stimulus		0.0115	4	643	CDKN1C,SLIT2,EGFR,VCAM1
GO: Biological Process	GO:0050727	regulation of inflammatory response		0.01158	3	341	ADORA2B,SLIT2,EGFR
GO: Biological Process	GO:0021987	cerebral cortex development		0.01229	2	121	SLIT2,EGFR
GO: Biological Process	GO:0033993	response to lipid		0.01242	5	1023	NASP,SLIT2,EGFR,PDK4,VCAM1
GO: Biological Process	GO:0021957	corticospinal tract morphogenesis		0.0125	1	9	SLIT2
GO: Biological Process	GO:0015677	copper ion import		0.0125	1	9	STEAP1
GO: Biological Process	GO:0061032	visceral serous pericardium development		0.0125	1	9	VCAM1
GO: Biological Process	GO:1903798	regulation of production of miRNAs involved in gene silencing by miRNA		0.0125	1	9	EGFR
GO: Biological Process	GO:0070848	response to growth factor		0.01329	4	671	CDKN1C,SLIT2,EGFR,VCAM1
GO: Biological Process	GO:0010038	response to metal ion		0.0138	3	364	EGFR,VCAM1,SOD3
GO: Biological Process	GO:0070920	regulation of production of small RNA involved in gene silencing by RNA		0.01388	1	10	EGFR
GO: Biological Process	GO:0021800	cerebral cortex tangential migration		0.01388	1	10	SLIT2
GO: Biological Process	GO:0044557	relaxation of smooth muscle		0.01388	1	10	ADORA2B
GO: Biological Process	GO:0022028	tangential migration from the subventricular zone to the olfactory bulb		0.01388	1	10	SLIT2
GO: Biological Process	GO:0048675	axon extension		0.0145	2	132	SLIT2,POU4F3
GO: Biological Process	GO:0050729	positive regulation of inflammatory response		0.0145	2	132	ADORA2B,EGFR
GO: Biological Process	GO:0032966	negative regulation of collagen biosynthetic process		0.01525	1	11	ADORA2B
GO: Biological Process	GO:0060346	bone trabecula formation		0.01525	1	11	CHAD
GO: Biological Process	GO:0032429	regulation of phospholipase A2 activity		0.01525	1	11	EGFR
GO: Biological Process	GO:0086069	bundle of His cell to Purkinje myocyte communication		0.01525	1	11	CTNNA3
GO: Biological Process	GO:0043116	negative regulation of vascular permeability		0.01525	1	11	SLIT2
GO: Biological Process	GO:0021891	olfactory bulb interneuron development		0.01525	1	11	SLIT2
GO: Biological Process	GO:0098911	regulation of ventricular cardiac muscle cell action potential		0.01525	1	11	CTNNA3
GO: Biological Process	GO:0031284	positive regulation of guanylate cyclase activity		0.01525	1	11	ADORA2B
GO: Biological Process	GO:0022414	reproductive process		0.01546	6	1503	CDKN1C,NASP,SLIT2,MEIG1,EGFR,VCAM1
GO: Biological Process	GO:0000003	reproduction		0.01556	6	1505	CDKN1C,NASP,SLIT2,MEIG1,EGFR,VCAM1
GO: Biological Process	GO:0042698	ovulation cycle		0.01577	2	138	SLIT2,EGFR
GO: Biological Process	GO:0006954	inflammatory response		0.01614	4	711	ADORA2B,SLIT2,EGFR,VCAM1
GO: Biological Process	GO:0010713	negative regulation of collagen metabolic process		0.01663	1	12	ADORA2B
GO: Biological Process	GO:0002676	regulation of chronic inflammatory response		0.01663	1	12	ADORA2B
GO: Biological Process	GO:0032930	positive regulation of superoxide anion generation		0.01663	1	12	EGFR
GO: Biological Process	GO:0035385	Roundabout signaling pathway		0.01663	1	12	SLIT2
GO: Biological Process	GO:0001973	adenosine receptor signaling pathway		0.01663	1	12	ADORA2B
GO: Biological Process	GO:0010510	regulation of acetyl-CoA biosynthetic process from pyruvate		0.01663	1	12	PDK4
GO: Biological Process	GO:2000637	positive regulation of gene silencing by miRNA		0.018	1	13	EGFR
GO: Biological Process	GO:0010960	magnesium ion homeostasis		0.018	1	13	EGFR
GO: Biological Process	GO:0050812	regulation of acyl-CoA biosynthetic process		0.018	1	13	PDK4
GO: Biological Process	GO:0031282	regulation of guanylate cyclase activity		0.018	1	13	ADORA2B
GO: Biological Process	GO:0021843	substrate-independent telencephalic tangential interneuron migration		0.018	1	13	SLIT2
GO: Biological Process	GO:0021826	substrate-independent telencephalic tangential migration		0.018	1	13	SLIT2
GO: Biological Process	GO:0022612	gland morphogenesis		0.01915	2	153	SLIT2,EGFR
GO: Biological Process	GO:0097286	iron ion import		0.01938	1	14	STEAP1
GO: Biological Process	GO:0060148	positive regulation of posttranscriptional gene silencing		0.01938	1	14	EGFR
GO: Biological Process	GO:0046890	regulation of lipid biosynthetic process		0.01986	2	156	ADORA2B,PDK4
GO: Biological Process	GO:1990267	response to transition metal nanoparticle		0.0201	2	157	VCAM1,SOD3
GO: Biological Process	GO:0006595	polyamine metabolic process		0.02075	1	15	SAT2
GO: Biological Process	GO:0061430	bone trabecula morphogenesis		0.02075	1	15	CHAD
GO: Biological Process	GO:0061029	eyelid development in camera-type eye		0.02075	1	15	EGFR
GO: Biological Process	GO:0002689	negative regulation of leukocyte chemotaxis		0.02075	1	15	SLIT2
GO: Biological Process	GO:0006086	acetyl-CoA biosynthetic process from pyruvate		0.02075	1	15	PDK4
GO: Biological Process	GO:0001933	negative regulation of protein phosphorylation		0.02092	3	426	CDKN1C,SLIT2,CHAD
GO: Biological Process	GO:1901700	response to oxygen-containing compound		0.02134	6	1614	NASP,SLIT2,EGFR,PDK4,VCAM1,SOD3
GO: Biological Process	GO:0045859	regulation of protein kinase activity		0.02146	4	775	CDKN1C,ADORA2B,CHAD,EGFR
GO: Biological Process	GO:0006937	regulation of muscle contraction		0.02156	2	163	ADORA2B,CTNNA3
GO: Biological Process	GO:0019722	calcium-mediated signaling		0.02156	2	163	EGFR,VCAM1
GO: Biological Process	GO:0055123	digestive system development		0.02206	2	165	CDKN1C,EGFR
GO: Biological Process	GO:0021889	olfactory bulb interneuron differentiation		0.02211	1	16	SLIT2
GO: Biological Process	GO:0032928	regulation of superoxide anion generation		0.02211	1	16	EGFR
GO: Biological Process	GO:1990138	neuron projection extension		0.02256	2	167	SLIT2,POU4F3
GO: Biological Process	GO:0045475	locomotor rhythm		0.02348	1	17	CIART
GO: Biological Process	GO:2000811	negative regulation of anoikis		0.02348	1	17	PDK4
GO: Biological Process	GO:0035584	calcium-mediated signaling using intracellular calcium source		0.02348	1	17	VCAM1
GO: Biological Process	GO:0050880	regulation of blood vessel size		0.02461	2	175	ADORA2B,EGFR
GO: Biological Process	GO:0021543	pallium development		0.02461	2	175	SLIT2,EGFR
GO: Biological Process	GO:0033008	positive regulation of mast cell activation involved in immune response		0.02485	1	18	ADORA2B
GO: Biological Process	GO:0043306	positive regulation of mast cell degranulation		0.02485	1	18	ADORA2B
GO: Biological Process	GO:0098659	inorganic cation import across plasma membrane		0.02485	1	18	STEAP1
GO: Biological Process	GO:0099587	inorganic ion import across plasma membrane		0.02485	1	18	STEAP1
GO: Biological Process	GO:0035150	regulation of tube size		0.02488	2	176	ADORA2B,EGFR
GO: Biological Process	GO:0031347	regulation of defense response		0.02578	4	820	ADORA2B,SLIT2,EGFR,PDK4
GO: Biological Process	GO:0048771	tissue remodeling		0.0262	2	181	EGFR,PDK4
GO: Biological Process	GO:0071675	regulation of mononuclear cell migration		0.02621	1	19	SLIT2
GO: Biological Process	GO:0045780	positive regulation of bone resorption		0.02621	1	19	EGFR
GO: Biological Process	GO:0006085	acetyl-CoA biosynthetic process		0.02621	1	19	PDK4
GO: Biological Process	GO:0043153	entrainment of circadian clock by photoperiod		0.02621	1	19	FBXL21
GO: Biological Process	GO:0014912	negative regulation of smooth muscle cell migration		0.02621	1	19	SLIT2
GO: Biological Process	GO:0046852	positive regulation of bone remodeling		0.02621	1	19	EGFR
GO: Biological Process	GO:1903034	regulation of response to wounding		0.0273	3	472	ADORA2B,SLIT2,EGFR
GO: Biological Process	GO:0042326	negative regulation of phosphorylation		0.02745	3	473	CDKN1C,SLIT2,CHAD
GO: Biological Process	GO:0098901	regulation of cardiac muscle cell action potential		0.02757	1	20	CTNNA3
GO: Biological Process	GO:0033605	positive regulation of catecholamine secretion		0.02757	1	20	ADORA2B
GO: Biological Process	GO:0043549	regulation of kinase activity		0.02808	4	842	CDKN1C,ADORA2B,CHAD,EGFR
GO: Biological Process	GO:1903036	positive regulation of response to wounding		0.02811	2	188	ADORA2B,EGFR
GO: Biological Process	GO:0009314	response to radiation		0.02851	3	480	EGFR,FBXL21,VCAM1
GO: Biological Process	GO:0006825	copper ion transport		0.02893	1	21	STEAP1
GO: Biological Process	GO:0071674	mononuclear cell migration		0.02893	1	21	SLIT2
GO: Biological Process	GO:0042402	cellular biogenic amine catabolic process		0.02893	1	21	SAT2
GO: Biological Process	GO:0042762	regulation of sulfur metabolic process		0.02893	1	21	PDK4
GO: Biological Process	GO:0045986	negative regulation of smooth muscle contraction		0.02893	1	21	ADORA2B
GO: Biological Process	GO:0014061	regulation of norepinephrine secretion		0.02893	1	21	ADORA2B
GO: Biological Process	GO:0009719	response to endogenous stimulus		0.02972	6	1740	CDKN1C,NASP,SLIT2,EGFR,PDK4,VCAM1
GO: Biological Process	GO:0033005	positive regulation of mast cell activation		0.03029	1	22	ADORA2B
GO: Biological Process	GO:0048243	norepinephrine secretion		0.03029	1	22	ADORA2B
GO: Biological Process	GO:0009310	amine catabolic process		0.03029	1	22	SAT2
GO: Biological Process	GO:0090025	regulation of monocyte chemotaxis		0.03029	1	22	SLIT2
GO: Biological Process	GO:0050901	leukocyte tethering or rolling		0.03029	1	22	VCAM1
GO: Biological Process	GO:0060065	uterus development		0.03029	1	22	CDKN1C
GO: Biological Process	GO:0010243	response to organonitrogen compound		0.03072	4	866	SLIT2,EGFR,PDK4,VCAM1
GO: Biological Process	GO:0060964	regulation of gene silencing by miRNA		0.03164	1	23	EGFR
GO: Biological Process	GO:0035588	G protein-coupled purinergic receptor signaling pathway		0.03164	1	23	ADORA2B
GO: Biological Process	GO:0043302	positive regulation of leukocyte degranulation		0.03164	1	23	ADORA2B
GO: Biological Process	GO:0014002	astrocyte development		0.03164	1	23	EGFR
GO: Biological Process	GO:1901654	response to ketone		0.03179	2	201	NASP,SLIT2
GO: Biological Process	GO:0051174	regulation of phosphorus metabolic process		0.03192	6	1769	CDKN1C,ADORA2B,SLIT2,CHAD,EGFR,PDK4
GO: Biological Process	GO:0048732	gland development		0.03229	3	504	CDKN1C,SLIT2,EGFR
GO: Biological Process	GO:0010893	positive regulation of steroid biosynthetic process		0.03299	1	24	ADORA2B
GO: Biological Process	GO:0051968	positive regulation of synaptic transmission, glutamatergic		0.03299	1	24	EGFR
GO: Biological Process	GO:0061756	leukocyte adhesion to vascular endothelial cell		0.03299	1	24	VCAM1
GO: Biological Process	GO:0019430	removal of superoxide radicals		0.03299	1	24	SOD3
GO: Biological Process	GO:0086005	ventricular cardiac muscle cell action potential		0.03299	1	24	CTNNA3
GO: Biological Process	GO:2000209	regulation of anoikis		0.03299	1	24	PDK4
GO: Biological Process	GO:0009648	photoperiodism		0.03299	1	24	FBXL21
GO: Biological Process	GO:0071229	cellular response to acid chemical		0.03325	2	206	EGFR,PDK4
GO: Biological Process	GO:0071900	regulation of protein serine/threonine kinase activity		0.03378	3	513	CDKN1C,ADORA2B,EGFR
GO: Biological Process	GO:1903846	positive regulation of cellular response to transforming growth factor beta stimulus		0.03435	1	25	CDKN1C
GO: Biological Process	GO:0060713	labyrinthine layer morphogenesis		0.03435	1	25	VCAM1
GO: Biological Process	GO:0015874	norepinephrine transport		0.03435	1	25	ADORA2B
GO: Biological Process	GO:0018345	protein palmitoylation		0.03435	1	25	ZDHHC2
GO: Biological Process	GO:0030511	positive regulation of transforming growth factor beta receptor signaling pathway		0.03435	1	25	CDKN1C
GO: Biological Process	GO:0071417	cellular response to organonitrogen compound		0.03445	3	517	SLIT2,EGFR,PDK4
GO: Biological Process	GO:0031668	cellular response to extracellular stimulus		0.03504	2	212	ADORA2B,PDK4
GO: Biological Process	GO:0007623	circadian rhythm		0.03565	2	214	CIART,FBXL21
GO: Biological Process	GO:0010575	positive regulation of vascular endothelial growth factor production		0.0357	1	26	ADORA2B
GO: Biological Process	GO:0060039	pericardium development		0.0357	1	26	VCAM1
GO: Biological Process	GO:0060966	regulation of gene silencing by RNA		0.0357	1	26	EGFR
GO: Biological Process	GO:0021952	central nervous system projection neuron axonogenesis		0.0357	1	26	SLIT2
GO: Biological Process	GO:0009649	entrainment of circadian clock		0.0357	1	26	FBXL21
GO: Biological Process	GO:0060147	regulation of posttranscriptional gene silencing		0.0357	1	26	EGFR
GO: Biological Process	GO:0009308	amine metabolic process		0.03687	2	218	SAT2,VCAM1
GO: Biological Process	GO:0071450	cellular response to oxygen radical		0.03704	1	27	SOD3
GO: Biological Process	GO:0002888	positive regulation of myeloid leukocyte mediated immunity		0.03704	1	27	ADORA2B
GO: Biological Process	GO:0090322	regulation of superoxide metabolic process		0.03704	1	27	EGFR
GO: Biological Process	GO:0071364	cellular response to epidermal growth factor stimulus		0.03704	1	27	EGFR
GO: Biological Process	GO:0071451	cellular response to superoxide		0.03704	1	27	SOD3
GO: Biological Process	GO:0060343	trabecula formation		0.03704	1	27	CHAD
GO: Biological Process	GO:0090257	regulation of muscle system process		0.03718	2	219	ADORA2B,CTNNA3
GO: Biological Process	GO:0048588	developmental cell growth		0.03811	2	222	SLIT2,POU4F3
GO: Biological Process	GO:0060571	morphogenesis of an epithelial fold		0.03839	1	28	EGFR
GO: Biological Process	GO:0042554	superoxide anion generation		0.03839	1	28	EGFR
GO: Biological Process	GO:0090066	regulation of anatomical structure size		0.03916	3	544	ADORA2B,SLIT2,EGFR
GO: Biological Process	GO:0010591	regulation of lamellipodium assembly		0.03974	1	29	SLIT2
GO: Biological Process	GO:0071514	genetic imprinting		0.03974	1	29	CDKN1C
GO: Biological Process	GO:0030325	adrenal gland development		0.03974	1	29	CDKN1C
GO: Biological Process	GO:0046688	response to copper ion		0.03974	1	29	SOD3
GO: Biological Process	GO:0007202	activation of phospholipase C activity		0.03974	1	29	EGFR
GO: Biological Process	GO:0043276	anoikis		0.03974	1	29	PDK4
GO: Biological Process	GO:1902668	negative regulation of axon guidance		0.03974	1	29	SLIT2
GO: Biological Process	GO:0019221	cytokine-mediated signaling pathway		0.04081	3	553	SLIT2,CHAD,VCAM1
GO: Biological Process	GO:0000303	response to superoxide		0.04108	1	30	SOD3
GO: Biological Process	GO:0090075	relaxation of muscle		0.04108	1	30	ADORA2B
GO: Biological Process	GO:0045932	negative regulation of muscle contraction		0.04108	1	30	ADORA2B
GO: Biological Process	GO:0043406	positive regulation of MAP kinase activity		0.04128	2	232	ADORA2B,EGFR
GO: Biological Process	GO:0010035	response to inorganic substance		0.04192	3	559	EGFR,VCAM1,SOD3
GO: Biological Process	GO:0001932	regulation of protein phosphorylation		0.04211	5	1404	CDKN1C,ADORA2B,SLIT2,CHAD,EGFR
GO: Biological Process	GO:0000305	response to oxygen radical		0.04242	1	31	SOD3
GO: Biological Process	GO:0086091	regulation of heart rate by cardiac conduction		0.04242	1	31	CTNNA3
GO: Biological Process	GO:0035587	purinergic receptor signaling pathway		0.04242	1	31	ADORA2B
GO: Biological Process	GO:0035196	production of miRNAs involved in gene silencing by miRNA		0.04242	1	31	EGFR
GO: Biological Process	GO:0086004	regulation of cardiac muscle cell contraction		0.04242	1	31	CTNNA3
GO: Biological Process	GO:0090022	regulation of neutrophil chemotaxis		0.04242	1	31	SLIT2
GO: Biological Process	GO:0016049	cell growth		0.04248	3	562	SLIT2,POU4F3,EGFR
GO: Biological Process	GO:0001894	tissue homeostasis		0.04323	2	238	EGFR,PDK4
GO: Biological Process	GO:0046320	regulation of fatty acid oxidation		0.04376	1	32	PDK4
GO: Biological Process	GO:0031050	dsRNA processing		0.04376	1	32	EGFR
GO: Biological Process	GO:0070849	response to epidermal growth factor		0.04376	1	32	EGFR
GO: Biological Process	GO:0070918	production of small RNA involved in gene silencing by RNA		0.04376	1	32	EGFR
GO: Biological Process	GO:0006182	cGMP biosynthetic process		0.04376	1	32	ADORA2B
GO: Biological Process	GO:0006335	DNA replication-dependent nucleosome assembly		0.04376	1	32	NASP
GO: Biological Process	GO:0034723	DNA replication-dependent nucleosome organization		0.04376	1	32	NASP
GO: Biological Process	GO:0007411	axon guidance		0.04388	2	240	SLIT2,POU4F3
GO: Biological Process	GO:0097485	neuron projection guidance		0.04421	2	241	SLIT2,POU4F3
GO: Biological Process	GO:0060560	developmental growth involved in morphogenesis		0.04454	2	242	SLIT2,POU4F3
GO: Biological Process	GO:0006935	chemotaxis		0.04497	3	575	SLIT2,POU4F3,VCAM1
GO: Biological Process	GO:0006929	substrate-dependent cell migration		0.0451	1	33	SLIT2
GO: Biological Process	GO:0010574	regulation of vascular endothelial growth factor production		0.0451	1	33	ADORA2B
GO: Biological Process	GO:0008045	motor neuron axon guidance		0.0451	1	33	SLIT2
GO: Biological Process	GO:0034105	positive regulation of tissue remodeling		0.0451	1	33	EGFR
GO: Biological Process	GO:0071392	cellular response to estradiol stimulus		0.0451	1	33	EGFR
GO: Biological Process	GO:0098609	cell-cell adhesion		0.04527	4	980	SLIT2,EGFR,VCAM1,CTNNA3
GO: Biological Process	GO:0048545	response to steroid hormone		0.04536	3	577	NASP,SLIT2,EGFR
GO: Biological Process	GO:0042330	taxis		0.04536	3	577	SLIT2,POU4F3,VCAM1
GO: Biological Process	GO:1901698	response to nitrogen compound		0.04541	4	981	SLIT2,EGFR,PDK4,VCAM1
GO: Biological Process	GO:0000082	G1/S transition of mitotic cell cycle		0.04621	2	247	EGFR,CABLES1
GO: Biological Process	GO:0021955	central nervous system neuron axonogenesis		0.04643	1	34	SLIT2
GO: Biological Process	GO:0002686	negative regulation of leukocyte migration		0.04643	1	34	SLIT2
GO: Biological Process	GO:0045940	positive regulation of steroid metabolic process		0.04643	1	34	ADORA2B
GO: Biological Process	GO:0006469	negative regulation of protein kinase activity		0.04689	2	249	CDKN1C,CHAD
GO: Biological Process	GO:0044057	regulation of system process		0.04713	3	586	ADORA2B,EGFR,CTNNA3
GO: Biological Process	GO:0008406	gonad development		0.04756	2	251	NASP,SLIT2
GO: Biological Process	GO:0055114	oxidation-reduction process		0.04758	4	996	PDK4,VCAM1,STEAP1,SOD3
GO: Biological Process	GO:0002042	cell migration involved in sprouting angiogenesis		0.04776	1	35	SLIT2
GO: Biological Process	GO:0010573	vascular endothelial growth factor production		0.04776	1	35	ADORA2B
GO: Biological Process	GO:0043114	regulation of vascular permeability		0.04776	1	35	SLIT2
GO: Biological Process	GO:0006084	acetyl-CoA metabolic process		0.04776	1	35	PDK4
GO: Biological Process	GO:0031667	response to nutrient levels		0.04833	3	592	SLIT2,PDK4,VCAM1
GO: Biological Process	GO:0006468	protein phosphorylation		0.04837	6	1952	CDKN1C,ADORA2B,SLIT2,CHAD,EGFR,PDK4
GO: Biological Process	GO:0007423	sensory organ development		0.04873	3	594	CDKN1C,POU4F3,EGFR
GO: Biological Process	GO:0030258	lipid modification		0.04893	2	255	EGFR,PDK4
GO: Biological Process	GO:0060326	cell chemotaxis		0.04893	2	255	SLIT2,VCAM1
GO: Biological Process	GO:0051338	regulation of transferase activity		0.04906	4	1006	CDKN1C,ADORA2B,CHAD,EGFR
GO: Biological Process	GO:0033006	regulation of mast cell activation involved in immune response		0.0491	1	36	ADORA2B
GO: Biological Process	GO:0045737	positive regulation of cyclin-dependent protein serine/threonine kinase activity		0.0491	1	36	EGFR
GO: Biological Process	GO:0043304	regulation of mast cell degranulation		0.0491	1	36	ADORA2B
GO: Biological Process	GO:1902742	apoptotic process involved in development		0.0491	1	36	SLIT2
GO: Biological Process	GO:0086002	cardiac muscle cell action potential involved in contraction		0.0491	1	36	CTNNA3
GO: Biological Process	GO:0090287	regulation of cellular response to growth factor stimulus		0.04927	2	256	CDKN1C,SLIT2
GO: Biological Process	GO:0045137	development of primary sexual characteristics		0.04927	2	256	NASP,SLIT2
GO: Biological Process	GO:1901699	cellular response to nitrogen compound		0.04934	3	597	SLIT2,EGFR,PDK4
GO: Biological Process	GO:0044843	cell cycle G1/S phase transition		0.04962	2	257	EGFR,CABLES1
GO: Biological Process	GO:0019932	second-messenger-mediated signaling		0.04962	2	257	EGFR,VCAM1
GO: Biological Process	GO:0045936	negative regulation of phosphate metabolic process		0.04975	3	599	CDKN1C,SLIT2,CHAD
GO: Biological Process	GO:0010563	negative regulation of phosphorus metabolic process		0.04975	3	599	CDKN1C,SLIT2,CHAD
GO: Cellular Component	GO:0097489	multivesicular body, internal vesicle lumen		0.001366	1	1	EGFR
GO: Cellular Component	GO:0070435	Shc-EGFR complex		0.002726	1	2	EGFR
GO: Cellular Component	GO:0071065	alpha9-beta1 integrin-vascular cell adhesion molecule-1 complex		0.002726	1	2	VCAM1
GO: Cellular Component	GO:0097487	multivesicular body, internal vesicle		0.004087	1	3	EGFR
GO: Cellular Component	GO:0010008	endosome membrane		0.01656	3	399	ZDHHC2,EGFR,STEAP1
GO: Cellular Component	GO:0030122	AP-2 adaptor complex		0.01759	1	13	EGFR
GO: Cellular Component	GO:0005916	fascia adherens		0.01759	1	13	CTNNA3
GO: Cellular Component	GO:0030128	clathrin coat of endocytic vesicle		0.01893	1	14	EGFR
GO: Cellular Component	GO:0044440	endosomal part		0.02067	3	434	ZDHHC2,EGFR,STEAP1
GO: Cellular Component	GO:0031012	extracellular matrix		0.02194	3	444	SLIT2,CHAD,SOD3
GO: Cellular Component	GO:0005768	endosome		0.02449	4	826	ZDHHC2,EGFR,VCAM1,STEAP1
GO: Cellular Component	GO:0030132	clathrin coat of coated pit		0.02561	1	19	EGFR
GO: Cellular Component	GO:0009986	cell surface		0.02927	4	873	ADORA2B,SLIT2,EGFR,VCAM1
GO: Cellular Component	GO:0030125	clathrin vesicle coat		0.03357	1	25	EGFR
GO: Cellular Component	GO:0002102	podosome		0.03489	1	26	VCAM1
GO: Cellular Component	GO:0030131	clathrin adaptor complex		0.04015	1	30	EGFR
GO: Cellular Component	GO:0005774	vacuolar membrane		0.04582	3	593	ZDHHC2,EGFR,STEAP1
GO: Cellular Component	GO:0019005	SCF ubiquitin ligase complex		0.04799	1	36	FBXL21
Pathway	83109	Endometrial cancer	BioSystems: KEGG	0.002069	2	50	EGFR,CTNNA3
Pathway	83070	Adherens junction	BioSystems: KEGG	0.004241	2	72	EGFR,CTNNA3
Pathway	83083	Leukocyte transendothelial migration	BioSystems: KEGG	0.01033	2	114	VCAM1,CTNNA3
Pathway	413399	GABA biosynthesis, eukaryotes, putrescine => GABA	BioSystems: KEGG	0.01223	1	9	SAT2
Pathway	83050	Calcium signaling pathway	BioSystems: KEGG	0.02503	2	182	ADORA2B,EGFR
Pathway	83067	Focal adhesion	BioSystems: KEGG	0.02953	2	199	CHAD,EGFR
Pathway	868086	Rap1 signaling pathway	BioSystems: KEGG	0.03261	2	210	ADORA2B,EGFR
Pathway	114227	Dorso-ventral axis formation	BioSystems: KEGG	0.03758	1	28	EGFR
Pathway	194384	African trypanosomiasis	BioSystems: KEGG	0.04676	1	35	VCAM1
